# Supplementary material for: The Genetic Structure of WildOrobanche cumanaWallr. (Orobanchaceae) Populations in Eastern Bulgaria Reflects Introgressions from Weedy Populations
Source: Hindawi journal article supplement (doi:10.1155/2014/150432), 2014-01-01
Supplement: f1 [file 150432.f1.pdf]

**Figure S1:** Description of the four steps (a), (b), (c), and (d), for the graphical method, according to Evanno [41], allowing the detection of the number of genetically homogeneous groups ( $K$ ) that best fit the data in the STRUCTURE analyses including 14 *O. cumana* populations from Spain and Bulgaria. Figure S1(a), Mean of  $\Pr(X|K)$  ( $\pm$ SD) over 10 runs for each  $K$  value. Figure S1(b), Rate of change of the likelihood distribution. Figure S1(c), Absolute values of the second order rate of change of the likelihood distribution. Figure S1(d), Delta $K$  values with respect to  $K$ . Figure S1(e) presents detail of Delta $K$  values with respect to  $K$  from  $K=3$  to  $K=14$

**(a)**

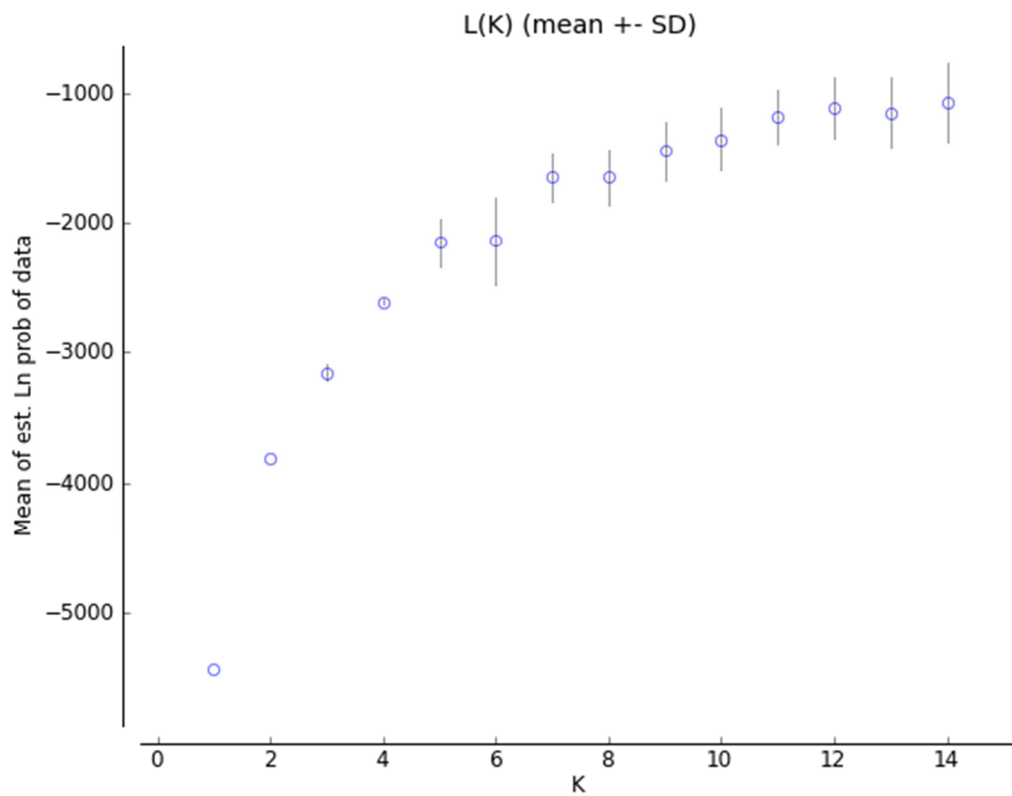

**(b)**

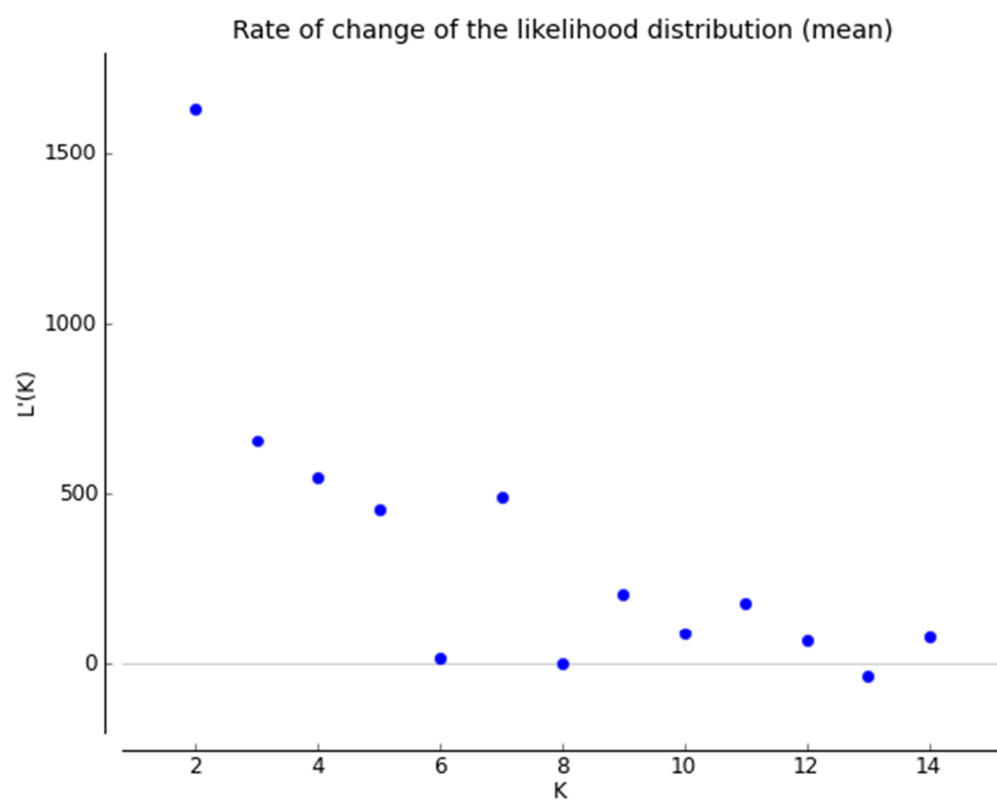

**(c)**

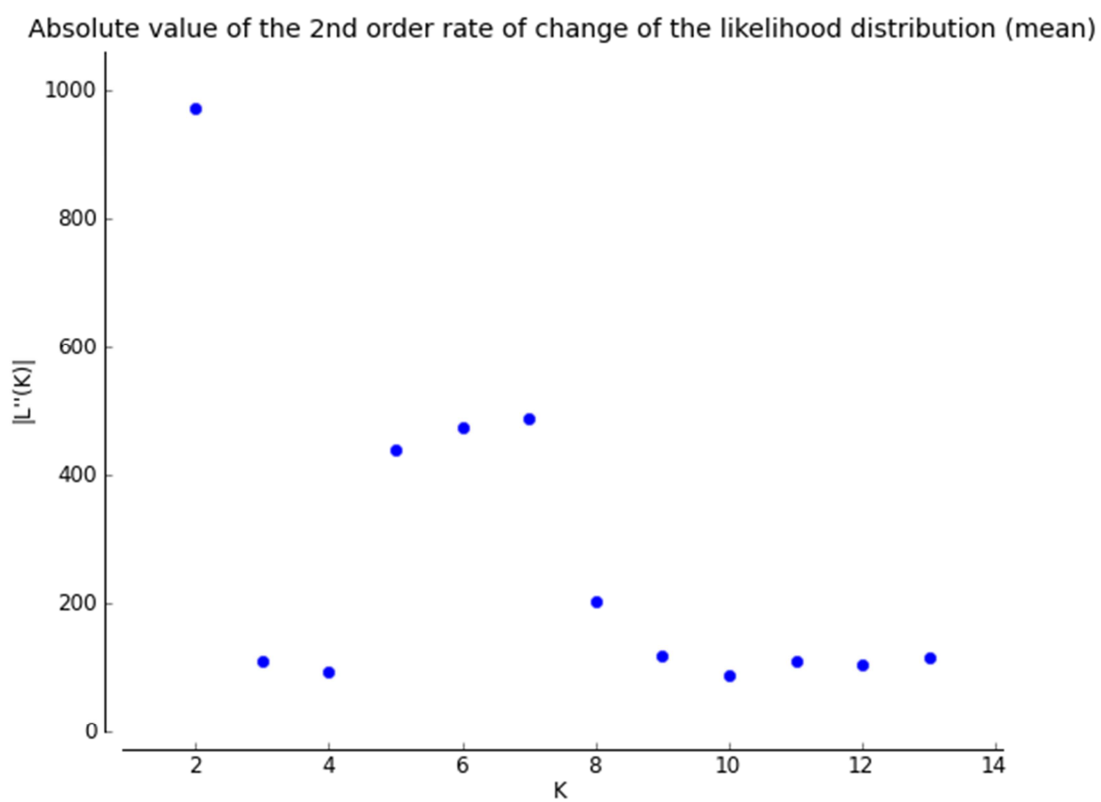

(d)

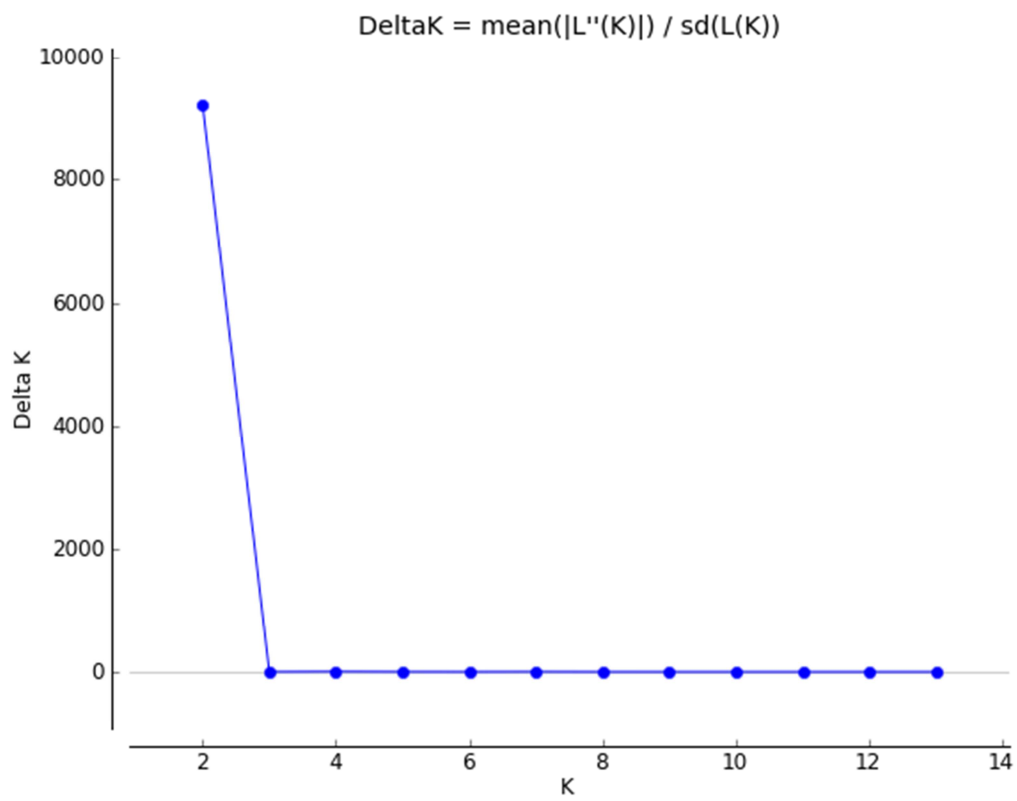

(e)

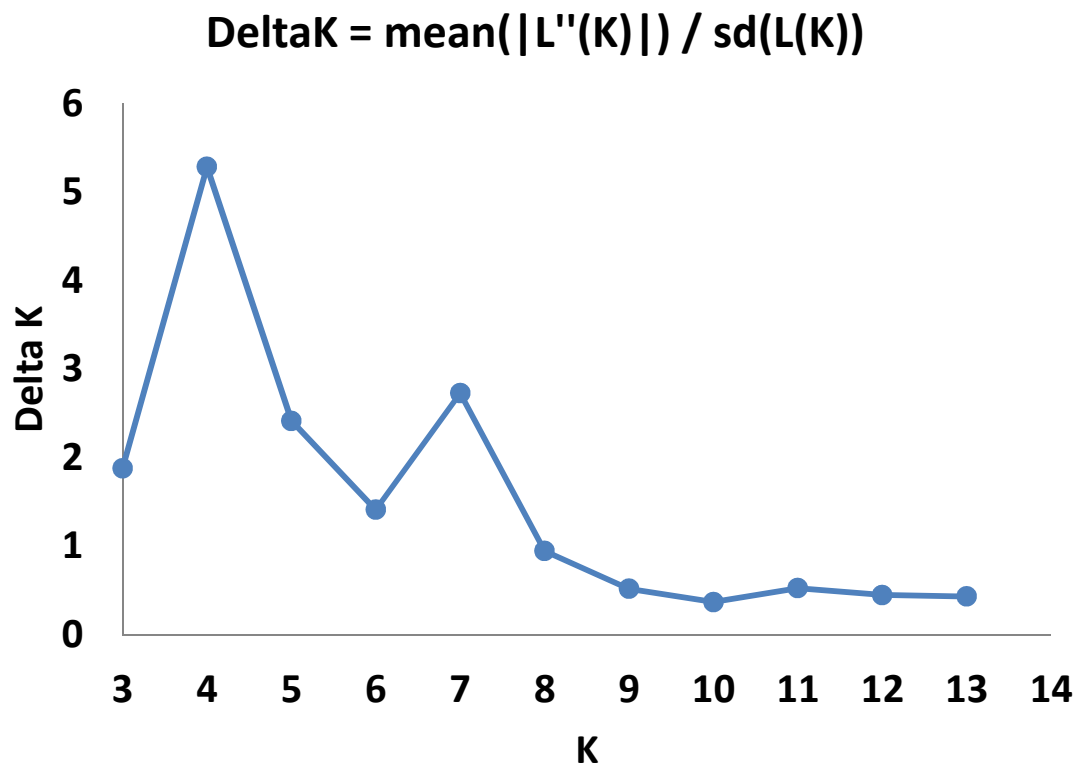

**Figure S2:** Results from STRUCTURE analyses including 14 *O. cumana* populations from Spain and Bulgaria (a) and (b). Figure S2(a) presents population structure with each individual being represented by a single vertical bar divided into colors, with each color representing one gene pool ( $K$ ) and the length of the colored segment showing the individual's estimated proportion of membership in that cluster, and Figure S2(b) population structure in which each population is represented by its constituent clusters by averaging across individuals the membership coefficients for each cluster within each population

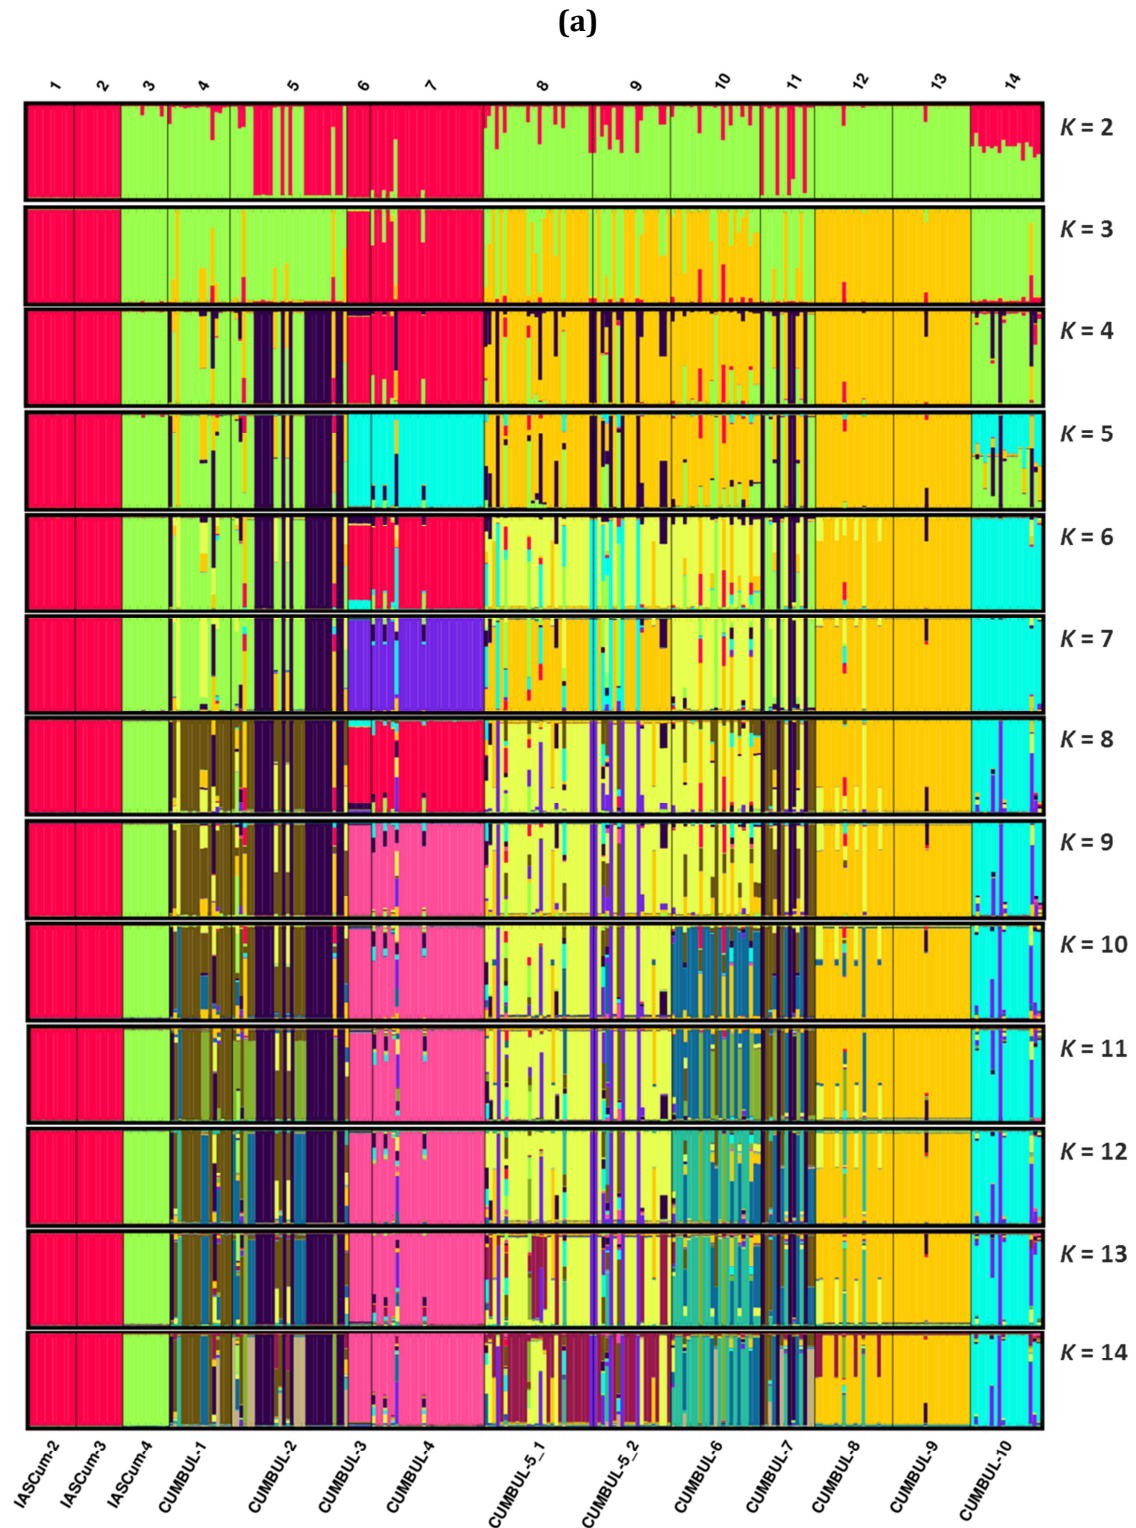

(b)

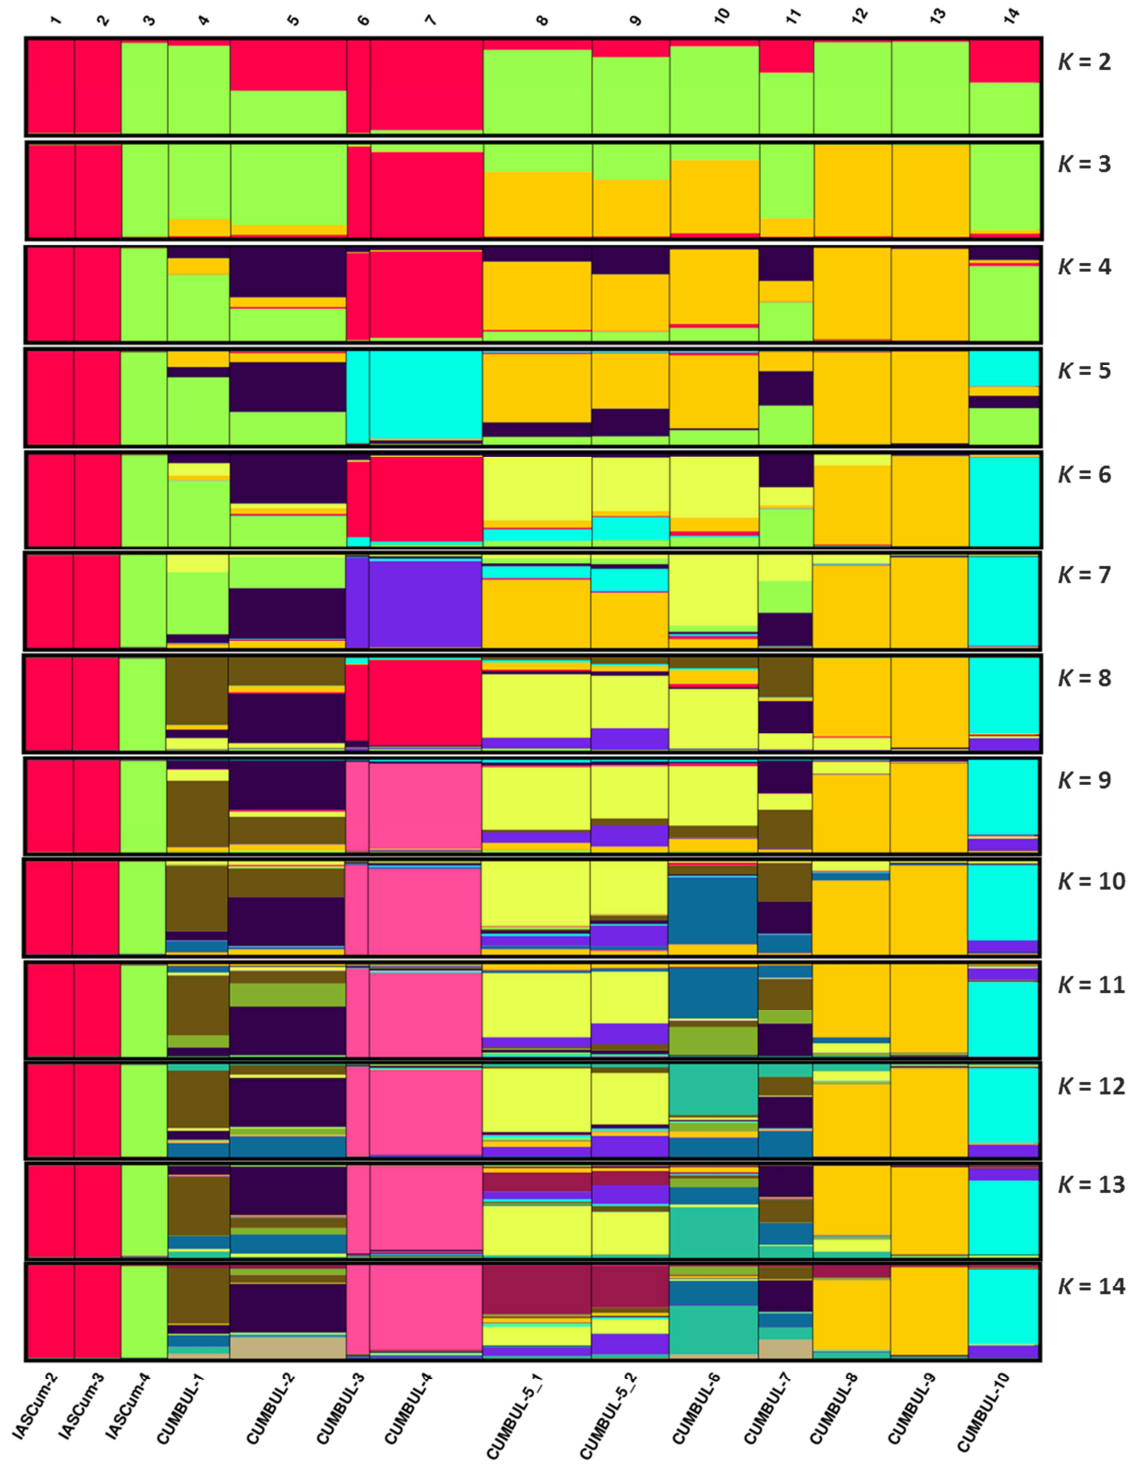

**Figure S3:** Description of the four steps (a), (b), (c), and (d), for the graphical method, according to Evanno [41], allowing the detection of the number of genetically homogeneous groups ( $K$ ) that best fit the data in the STRUCTURE analyses including 11 *O. cumana* populations from Bulgaria. Figure S3(a), Mean of  $\Pr(X|K)$  ( $\pm$ SD) over 10 runs for each  $K$  value. Figure S3(b), Rate of change of the likelihood distribution. Figure S3(c), Absolute values of the second order rate of change of the likelihood distribution. Figure S3(d), Delta $K$  values with respect to  $K$

(a)

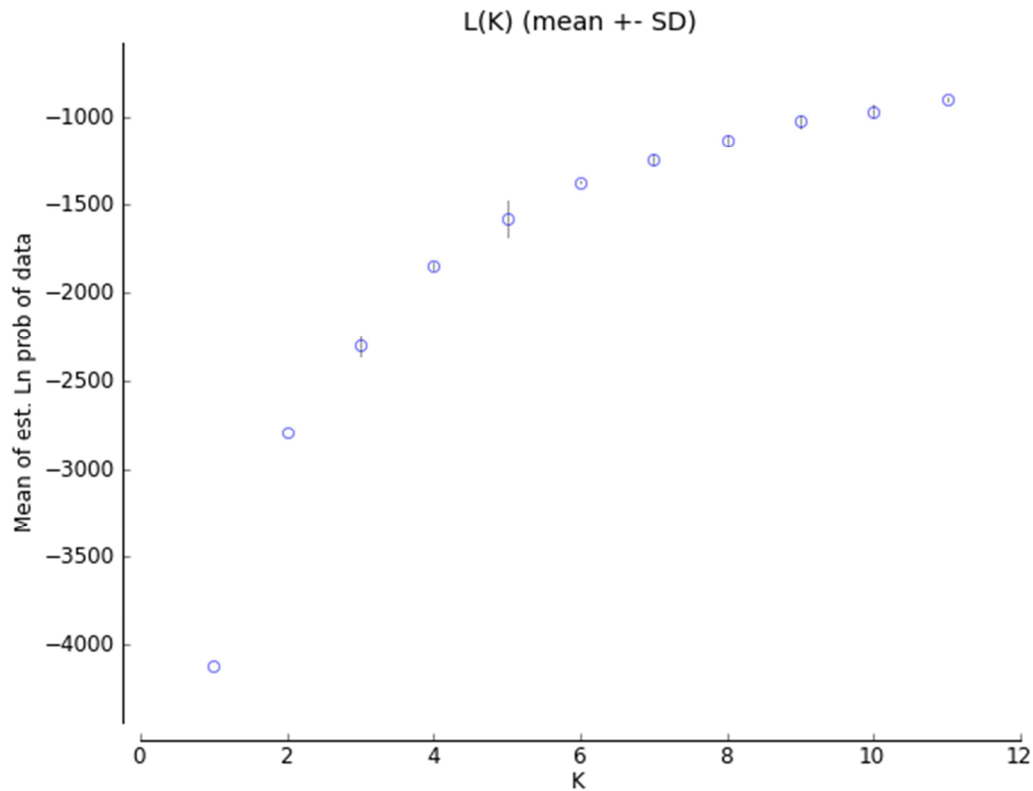

**(b)**

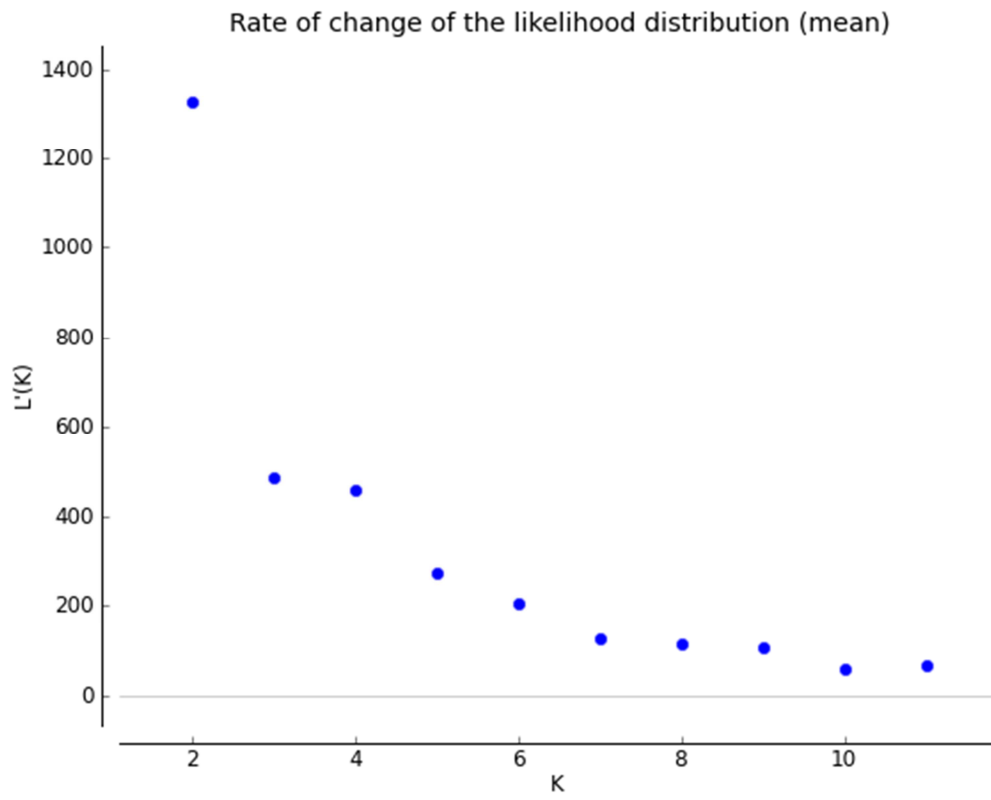

**(c)**

Absolute value of the 2nd order rate of change of the likelihood distribution (mean)

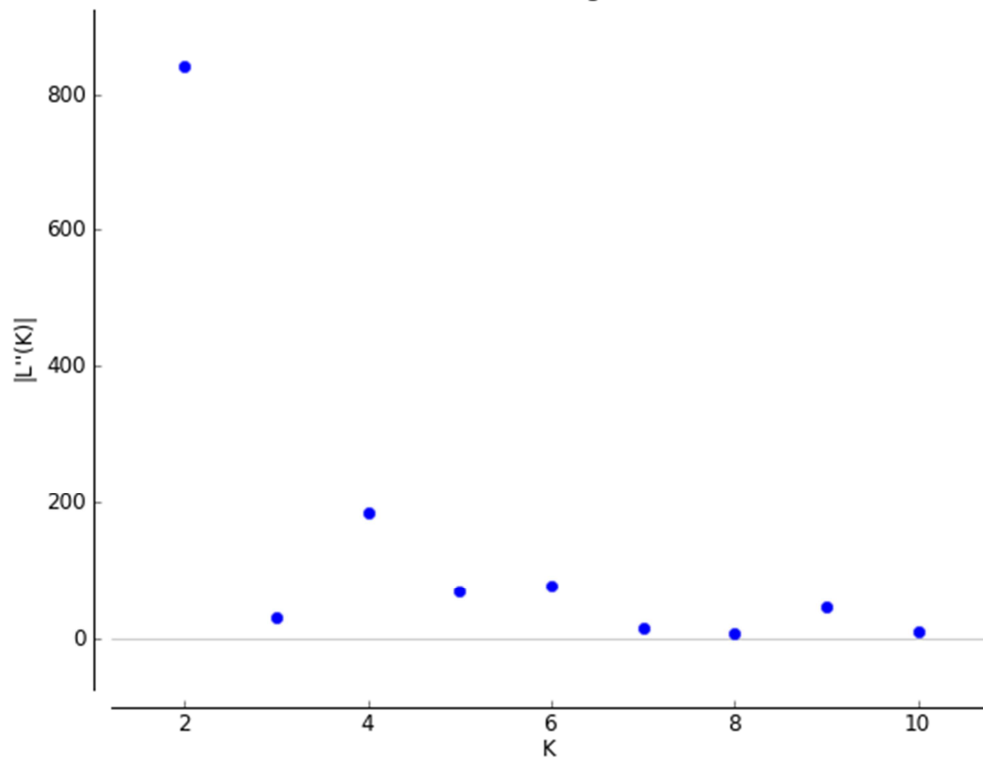

**(d)**

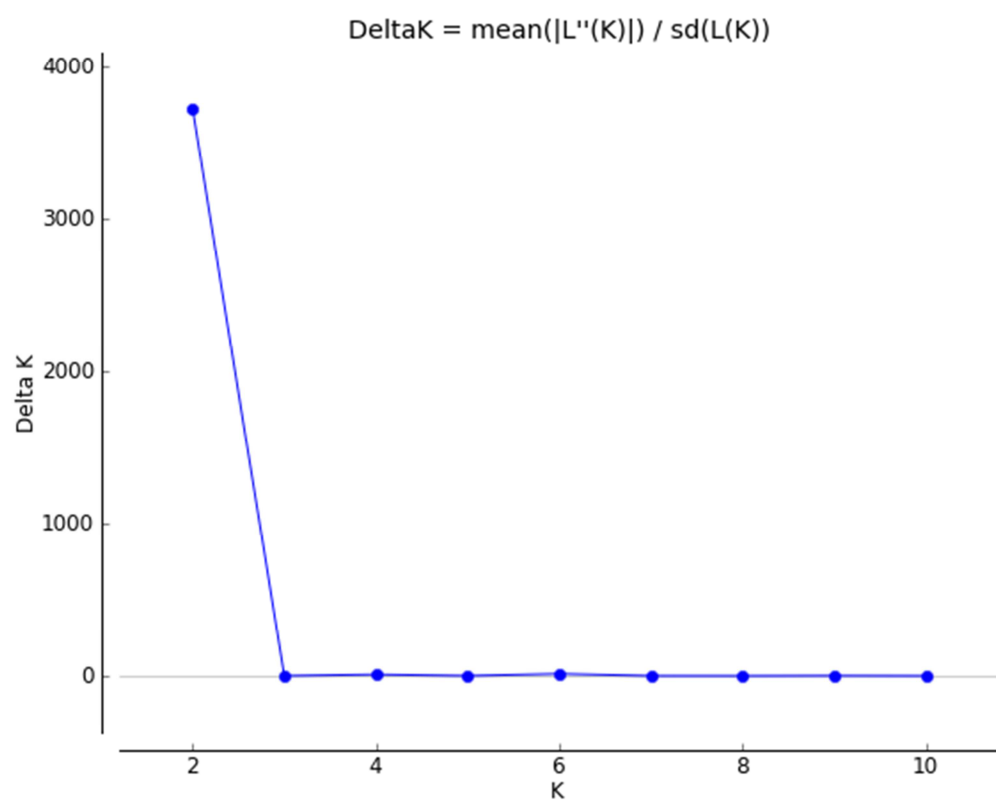



**Table S1:** Characteristics of 15 microsatellite loci genotyped in 260 *Orobanche cumana* individuals from 14 populations and subpopulations. Na: average observed allele number, Ho: observed heterozygosity, He: expected heterozygosity.

| SSR marker | Allele size (bp) | Na ( $\pm$ SE) | Ho ( $\pm$ SE) | He ( $\pm$ SE) | $F_{ST}$ |
|------------|------------------|----------------|----------------|----------------|----------|
| Ocum-052   | 108              | 1.643 (0.13)   | 0.011 (0.006)  | 0.148 (0.04)   | 0.761    |
| Ocum-059   | 90               | 1.571 (0.14)   | 0.003 (0.003)  | 0.153 (0.05)   | 0.682    |
| Ocum-070   | 96               | 1.357 (0.13)   | 0.006 (0.004)  | 0.095 (0.04)   | 0.813    |
| Ocum-074   | 99               | 1.714 (0.22)   | 0.018 (0.008)  | 0.176 (0.06)   | 0.690    |
| Ocum-075   | 110              | 1.357 (0.13)   | 0.000 (0.000)  | 0.076 (0.03)   | 0.806    |
| Ocum-081   | 90               | 1.571 (0.17)   | 0.008 (0.005)  | 0.138 (0.05)   | 0.762    |
| Ocum-087   | 134              | 1.500 (0.14)   | 0.000 (0.000)  | 0.091 (0.03)   | 0.847    |
| Ocum-108   | 143              | 1.214 (0.11)   | 0.004 (0.004)  | 0.024 (0.01)   | 0.910    |
| Ocum-122   | 241              | 1.429 (0.14)   | 0.006 (0.004)  | 0.115 (0.05)   | 0.566    |
| Ocum-141   | 191              | 1.500 (0.14)   | 0.008 (0.008)  | 0.169 (0.05)   | 0.646    |
| Ocum-160   | 136              | 1.643 (0.13)   | 0.018 (0.012)  | 0.187 (0.05)   | 0.564    |
| Ocum-174   | 190              | 1.429 (0.14)   | 0.003 (0.003)  | 0.130 (0.05)   | 0.616    |
| Ocum-196   | 192              | 1.929 (0.24)   | 0.008 (0.006)  | 0.187 (0.05)   | 0.699    |
| Ocum-197   | 95               | 1.500 (0.20)   | 0.013 (0.007)  | 0.087 (0.04)   | 0.834    |
| Ocum-206   | 119              | 1.071 (0.07)   | 0.000 (0.000)  | 0.020 (0.02)   | 0.924    |

**Table S2:** Values of the genetic distance coefficient  $G_{ST}$  calculated between all pairs of *Orobancha cumana* populations collected on wild hosts (highlighted in bold) and on sunflower.

|                   | IASCum-<br>2        | IASCum-<br>3 | IASCum-<br>4 | <b>CUMBUL-<br/>1</b> | <b>CUMBUL-<br/>2</b> | <b>CUMBUL-<br/>3</b> | <b>CUMBUL-<br/>4</b> | <b>CUMBUL-<br/>5_1</b> | <b>CUMBUL-<br/>5_2</b> | <b>CUMBUL-<br/>6</b> | <b>CUMBUL-<br/>7</b> | CUMBUL-<br>8 | CUMBUL-<br>9 |
|-------------------|---------------------|--------------|--------------|----------------------|----------------------|----------------------|----------------------|------------------------|------------------------|----------------------|----------------------|--------------|--------------|
| IASCum-3          | 0,000 <sup>ns</sup> |              |              |                      |                      |                      |                      |                        |                        |                      |                      |              |              |
| IASCum-4          | 0,980               | 0,980        |              |                      |                      |                      |                      |                        |                        |                      |                      |              |              |
| <b>CUMBUL-1</b>   | 0,710               | 0,710        | 0,490        |                      |                      |                      |                      |                        |                        |                      |                      |              |              |
| <b>CUMBUL-2</b>   | 0,575               | 0,575        | 0,533        | 0,159                |                      |                      |                      |                        |                        |                      |                      |              |              |
| <b>CUMBUL-3</b>   | 1,000               | 1,000        | 0,972*       | 0,651                | 0,489                |                      |                      |                        |                        |                      |                      |              |              |
| <b>CUMBUL-4</b>   | 0,808               | 0,808        | 0,822        | 0,561                | 0,441                | 0,483                |                      |                        |                        |                      |                      |              |              |
| <b>CUMBUL-5_1</b> | 0,739               | 0,739        | 0,676        | 0,345                | 0,238                | 0,696                | 0,615                |                        |                        |                      |                      |              |              |
| <b>CUMBUL-5_2</b> | 0,638               | 0,638        | 0,585        | 0,290                | 0,158                | 0,571                | 0,521                | 0,008 <sup>ns</sup>    |                        |                      |                      |              |              |
| <b>CUMBUL-6</b>   | 0,751               | 0,751        | 0,627        | 0,234*               | 0,233                | 0,715                | 0,645                | 0,166                  | 0,151                  |                      |                      |              |              |
| <b>CUMBUL-7</b>   | 0,633               | 0,633        | 0,556        | 0,107*               | 0,008 <sup>ns</sup>  | 0,545                | 0,490                | 0,237                  | 0,171                  | 0,170                |                      |              |              |
| CUMBUL-8          | 0,948               | 0,948        | 0,902        | 0,479                | 0,402                | 0,940                | 0,809                | 0,241                  | 0,224                  | 0,209                | 0,385                |              |              |
| CUMBUL-9          | 0,980               | 0,980        | 0,941        | 0,510                | 0,424                | 0,976                | 0,836                | 0,285                  | 0,257                  | 0,256                | 0,415                | 0,012*       |              |
| CUMBUL-10         | 0,825               | 0,825        | 0,738        | 0,456                | 0,344                | 0,697                | 0,561                | 0,433                  | 0,331                  | 0,487                | 0,371                | 0,677        | 0,721        |

All values were significant at  $P = 0.001$  based on 999 random permutations of the data, with the exception of those indicated with the symbols \*: significant at  $P$

< 0.01, and ns: Non-significant.
